# Supplementary material for: CSI NGS Portal: An Online Platform for Automated NGS Data Analysis and Sharing
Source: MDPI journal article supplement (doi:10.3390/ijms21113828), 2020-05-28
Supplement: s1 [file s1]

**Supplementary Table S1: List of tools & packages and their usage in CSI NGS Portal**

All the tools and packages are regularly updated to the latest stable versions (unless version number is explicitly specified).  
An exhaustive list of dependencies are omitted.

| Tool/package                   | Bioinformatics Pipeline                                        | Usage                                                      | Link                                                                                                                                                                                                                              |
|--------------------------------|----------------------------------------------------------------|------------------------------------------------------------|-----------------------------------------------------------------------------------------------------------------------------------------------------------------------------------------------------------------------------------|
| <b>Website Development</b>     |                                                                |                                                            |                                                                                                                                                                                                                                   |
| Apache2                        | NA                                                             | Web server                                                 | <a href="https://httpd.apache.org/">https://httpd.apache.org/</a>                                                                                                                                                                 |
| PHP                            | NA                                                             | Website interface and functionality                        | <a href="https://www.php.net/">https://www.php.net/</a>                                                                                                                                                                           |
| HTML5                          | NA                                                             | Website interface and functionality                        | <a href="https://www.w3.org/TR/html5/">https://www.w3.org/TR/html5/</a>                                                                                                                                                           |
| CSS                            | NA                                                             | Website styling                                            | <a href="https://www.w3.org/Style/CSS/">https://www.w3.org/Style/CSS/</a>                                                                                                                                                         |
| Bootstrap v3.3.6               | NA                                                             | Interactive tables and responsive design                   | <a href="https://getbootstrap.com/">https://getbootstrap.com/</a>                                                                                                                                                                 |
| JavaScript                     | NA                                                             | Dynamic features                                           | <a href="https://developer.mozilla.org/en-US/docs/Web/JavaScript">https://developer.mozilla.org/en-US/docs/Web/JavaScript</a>                                                                                                     |
| jQuery v1.12.1                 | NA                                                             | Dynamic features                                           | <a href="https://jquery.com/">https://jquery.com/</a>                                                                                                                                                                             |
| jQuery File Upload             | NA                                                             | Data upload interface                                      | <a href="https://github.com/blueimp/jQuery-File-Upload">https://github.com/blueimp/jQuery-File-Upload</a>                                                                                                                         |
| <b>Database</b>                |                                                                |                                                            |                                                                                                                                                                                                                                   |
| MariaDB                        | NA                                                             | Data storage                                               | <a href="https://mariadb.org/">https://mariadb.org/</a>                                                                                                                                                                           |
| <b>Programming Languages</b>   |                                                                |                                                            |                                                                                                                                                                                                                                   |
| Bash                           | All                                                            | Wrapper scripts for pipeline development                   | <a href="https://www.gnu.org/software/bash/">https://www.gnu.org/software/bash/</a>                                                                                                                                               |
| Python                         | All                                                            | Running of packages in conda environment                   | <a href="https://www.python.org/">https://www.python.org/</a> , <a href="https://anaconda.com">https://anaconda.com</a>                                                                                                           |
| Perl                           | All                                                            | Running of in-house and external pipelines                 | <a href="https://www.perl.org/">https://www.perl.org/</a>                                                                                                                                                                         |
| R                              | Diff4C-Seq, Diff-Exp, Pathway-Enrichment                       | Running CRAN and Bioconductor packages                     | <a href="https://www.r-project.org/">https://www.r-project.org/</a>                                                                                                                                                               |
| <b>Anaconda2 Packages</b>      |                                                                |                                                            |                                                                                                                                                                                                                                   |
| FastQC                         | All                                                            | Quality control                                            | <a href="https://www.bioinformatics.babraham.ac.uk/projects/fastqc/">https://www.bioinformatics.babraham.ac.uk/projects/fastqc/</a>                                                                                               |
| Trimmomatic                    | All                                                            | Adapter removal and read trimming                          | <a href="http://www.usadellab.org/cms/?page=trimmomatic">http://www.usadellab.org/cms/?page=trimmomatic</a>                                                                                                                       |
| bedtools                       | All                                                            | Genome arithmetic                                          | <a href="https://bedtools.readthedocs.io">https://bedtools.readthedocs.io</a>                                                                                                                                                     |
| Samtools                       | All                                                            | Manipulation of HTS files                                  | <a href="https://github.com/samtools/samtools">https://github.com/samtools/samtools</a>                                                                                                                                           |
| Picard                         | DNA-Seq, RIP-Seq                                               | Manipulation of HTS files                                  | <a href="https://github.com/broadinstitute/picard">https://github.com/broadinstitute/picard</a>                                                                                                                                   |
| BWA (mem)                      | DNA-Seq, RNA-Editing, 4C-Seq                                   | Read mapping                                               | <a href="https://github.com/lh3/bwa">https://github.com/lh3/bwa</a>                                                                                                                                                               |
| Bowtie2                        | SHAPE-Seq, Bisulfite-Seq, ngsplot-deepTools                    | Read mapping                                               | <a href="http://bowtie-bio.sourceforge.net/bowtie2/index.shtml">http://bowtie-bio.sourceforge.net/bowtie2/index.shtml</a>                                                                                                         |
| NovoAlign                      | smallRNA                                                       | Read mapping                                               | <a href="http://www.novocraft.com/products/novoalign/">http://www.novocraft.com/products/novoalign/</a>                                                                                                                           |
| STAR                           | RNA-Seq, RIP-Seq, rMATs, circRNA, eCLIP-Seq, ngsplot-deepTools | RNA-Seq read alignment                                     | <a href="https://github.com/alexdobin/STAR">https://github.com/alexdobin/STAR</a>                                                                                                                                                 |
| GATK4 (Mutect2)                | DNA-Seq                                                        | Genome analysis toolkit (Mutation calling)                 | <a href="https://software.broadinstitute.org/gatk/documentation/article?id=11136">https://software.broadinstitute.org/gatk/documentation/article?id=11136</a>                                                                     |
| HTSeq (count)                  | RNA-Seq                                                        | Gene expression quantification                             | <a href="https://htseq.readthedocs.io/en/master/count.html">https://htseq.readthedocs.io/en/master/count.html</a>                                                                                                                 |
| Salmon                         | RNA-Seq                                                        | Isoform expression quantification                          | <a href="https://salmon.readthedocs.io/en/latest/salmon.html">https://salmon.readthedocs.io/en/latest/salmon.html</a>                                                                                                             |
| MACS2                          | ChIP-Seq, RIP-Seq                                              | Identification of transcription factor binding sites       | <a href="https://github.com/taoliu/MACS">https://github.com/taoliu/MACS</a>                                                                                                                                                       |
| Homer                          | ChIP-Seq                                                       | Motif enrichment analysis                                  | <a href="http://homer.ucsd.edu/homer/motif/">http://homer.ucsd.edu/homer/motif/</a>                                                                                                                                               |
| ViennaRNA (RNAfold)            | SHAPE-Seq                                                      | RNA secondary structure prediction                         | <a href="https://www.tbi.univie.ac.at/RNA/RNAfold.1.html">https://www.tbi.univie.ac.at/RNA/RNAfold.1.html</a>                                                                                                                     |
| TrimGalore/Cutadapt            | RIP-Seq, Bisulfite-Seq                                         | Adapter removal and read trimming                          | <a href="https://github.com/FelixKrueger/TrimGalore">https://github.com/FelixKrueger/TrimGalore</a>                                                                                                                               |
| Singularity                    | eCLIP-Seq                                                      | Running eCLIP container                                    | <a href="https://www.sylabs.io/guides/2.6/user-guide/">https://www.sylabs.io/guides/2.6/user-guide/</a>                                                                                                                           |
| Bismark                        | Bisulfite-Seq                                                  | Methylation calling of bisulfite treated sequencing reads  | <a href="https://www.bioinformatics.babraham.ac.uk/projects/bismark/">https://www.bioinformatics.babraham.ac.uk/projects/bismark/</a>                                                                                             |
| metilene                       | Bisulfite-Seq                                                  | Identification of differentially methylated regions        | <a href="https://www.bioinf.uni-leipzig.de/Software/metilene/">https://www.bioinf.uni-leipzig.de/Software/metilene/</a>                                                                                                           |
| <b>R CRAN Packages</b>         |                                                                |                                                            |                                                                                                                                                                                                                                   |
| R ggplot2                      | Diff-Exp, Pathway-Enrichment                                   | Generation of plots and data visualisation                 | <a href="https://cran.r-project.org/web/packages/ggplot2/index.html">https://cran.r-project.org/web/packages/ggplot2/index.html</a>                                                                                               |
| R superheat                    | Diff-Exp                                                       | Heatmap generation                                         | <a href="https://rlbarter.github.io/superheat/">https://rlbarter.github.io/superheat/</a>                                                                                                                                         |
| R tidyverse                    | 4C-Seq, Diff-Exp, Pathway-Enrichment                           | Data manipulation                                          | <a href="https://www.tidyverse.org/">https://www.tidyverse.org/</a>                                                                                                                                                               |
| R RMySQL                       | Diff-Exp                                                       | Database connection                                        | <a href="https://cran.r-project.org/web/packages/RMySQL/index.html">https://cran.r-project.org/web/packages/RMySQL/index.html</a>                                                                                                 |
| <b>R Bioconductor Packages</b> |                                                                |                                                            |                                                                                                                                                                                                                                   |
| R Bioconductor r3Cseq          | 4C-Seq                                                         | Identification of 4C interactions                          | <a href="https://www.bioconductor.org/packages/release/bioc/html/r3Cseq.html">https://www.bioconductor.org/packages/release/bioc/html/r3Cseq.html</a>                                                                             |
| R Bioconductor BSgenome        | 4C-Seq                                                         | Reference genome annotations                               | <a href="https://bioconductor.org/packages/release/bioc/html/BSgenome.html">https://bioconductor.org/packages/release/bioc/html/BSgenome.html</a>                                                                                 |
| R Bioconductor org.Hs.eg.db    | Diff-Exp                                                       | Reference genome annotations                               | <a href="https://bioconductor.org/packages/release/data/annotation/html/org.Hs.eg.db.html">https://bioconductor.org/packages/release/data/annotation/html/org.Hs.eg.db.html</a>                                                   |
| R Bioconductor DESeq2          | Diff-Exp                                                       | Differential gene expression analysis                      | <a href="https://www.bioconductor.org/packages/release/bioc/html/DESeq2.html">https://www.bioconductor.org/packages/release/bioc/html/DESeq2.html</a>                                                                             |
| R Bioconductor DEXSeq          | Diff-Exp                                                       | Differential exon usage analysis                           | <a href="https://bioconductor.org/packages/release/bioc/html/DEXSeq.html">https://bioconductor.org/packages/release/bioc/html/DEXSeq.html</a>                                                                                     |
| R Bioconductor regionReport    | Diff-Exp                                                       | Generation of interactive report for DESeq2 results        | <a href="https://www.bioconductor.org/packages/release/bioc/html/regionReport.html">https://www.bioconductor.org/packages/release/bioc/html/regionReport.html</a>                                                                 |
| R Bioconductor biomaRt         | Diff-Exp                                                       | ID mapping and conversion                                  | <a href="https://www.bioconductor.org/packages/release/bioc/html/biomaRt.html">https://www.bioconductor.org/packages/release/bioc/html/biomaRt.html</a>                                                                           |
| R Bioconductor ReactomePA      | Diff-Exp, Pathway-Enrichment                                   | Pathway enrichment analysis                                | <a href="https://www.bioconductor.org/packages/release/bioc/html/ReactomePA.html">https://www.bioconductor.org/packages/release/bioc/html/ReactomePA.html</a>                                                                     |
| R Bioconductor enrichplot      | Diff-Exp, Pathway-Enrichment                                   | Visualisation of pathway enrichment results                | <a href="https://bioconductor.org/packages/release/bioc/html/enrichplot.html">https://bioconductor.org/packages/release/bioc/html/enrichplot.html</a>                                                                             |
| R Bioconductor DOSE            | Diff-Exp, Pathway-Enrichment                                   | Visualisation of pathway enrichment results                | <a href="https://bioconductor.org/packages/release/bioc/html/DOSE.html">https://bioconductor.org/packages/release/bioc/html/DOSE.html</a>                                                                                         |
| <b>Standalone Software</b>     |                                                                |                                                            |                                                                                                                                                                                                                                   |
| ANNOVAR                        | DNA-Seq, RNA-Editing, eCLIP-Seq                                | Annotation of variants and peaks                           | <a href="http://annovar.openbioinformatics.org">http://annovar.openbioinformatics.org</a>                                                                                                                                         |
| GSEA                           | Diff-Exp                                                       | Gene set enrichment analysis                               | <a href="https://www.gsea-msigdb.org/gsea/index.jsp">https://www.gsea-msigdb.org/gsea/index.jsp</a>                                                                                                                               |
| iCSHAPE                        | SHAPE-Seq                                                      | SHAPE reactivity calculation                               | <a href="https://github.com/qczhang/iCSHAPE">https://github.com/qczhang/iCSHAPE</a>                                                                                                                                               |
| rMATs                          | rMATs                                                          | Identification of differential alternative splicing events | <a href="http://rnaseq-mats.sourceforge.net/">http://rnaseq-mats.sourceforge.net/</a>                                                                                                                                             |
| eCLIP                          | eCLIP-Seq                                                      | Identification of genomic locations of RNA-bound proteins  | <a href="https://github.com/Yeolab/edip">https://github.com/Yeolab/edip</a>                                                                                                                                                       |
| Cell Ranger                    | scRNA-Seq                                                      | Single cell gene expression analysis                       | <a href="https://support.10xgenomics.com/single-cell-gene-expression/software/pipelines/latest/what-is-cell-ranger">https://support.10xgenomics.com/single-cell-gene-expression/software/pipelines/latest/what-is-cell-ranger</a> |
| ngsplot                        | ngsplot-deepTools                                              | Visual exploration at functional genomic regions           | <a href="https://github.com/shenlab-sinai/ngsplot">https://github.com/shenlab-sinai/ngsplot</a>                                                                                                                                   |
| deepTools                      | ngsplot-deepTools                                              | Visual exploration at functional genomic regions           | <a href="https://github.com/deeptools/deeptools">https://github.com/deeptools/deeptools</a>                                                                                                                                       |
