# Supplementary material for: CSI NGS Portal: An Online Platform for Automated NGS Data Analysis and Sharing
Source: Int J Mol Sci. 2020 May 28;21(11):3828. doi: 10.3390/ijms21113828 (PMC7312552; doi:10.3390/ijms21113828)
Supplement: Supplementary file 1 [file ijms-21-03828-s001.zip]

Archive with 6 entries (6 files):
- Supplementary_Data.docx
- __MACOSX/._Supplementary_Data.docx
- Supplementary_Table_S1.pdf
- __MACOSX/._Supplementary_Table_S1.pdf
- Supplementary_Table_S1.xlsx
- __MACOSX/._Supplementary_Table_S1.xlsx
